# Supplementary material for: Dynamics of human B and T cell adaptive immune responses to Kyasanur Forest disease virus infection
Source: PubMed Central journal article supplement (PMC7499197; doi:10.1038/s41598-020-72205-1), 2020-09-17
Supplement: 41598_2020_72205_MOESM1_ESM.pdf [file 41598_2020_72205_MOESM1_ESM.pdf]

## Supplementary information

### Dynamics of human B and T cell adaptive immune responses to Kyasanur Forest disease virus infection

Santhosha Devadiga<sup>1</sup>#, Anita K. McElroy<sup>2</sup>#, Suresha G Prabhu<sup>1</sup>, Govindakarnavar

Arunkumar<sup>1</sup>@

Supplementary Figure 1: Representative gating strategy

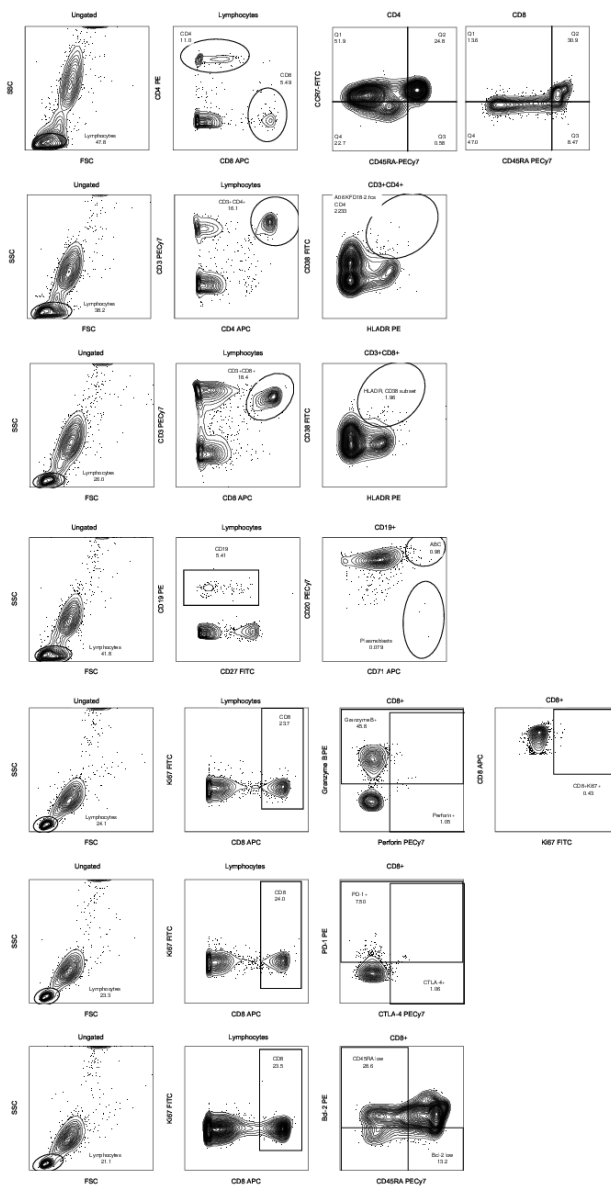

## Supplementary figure 2:

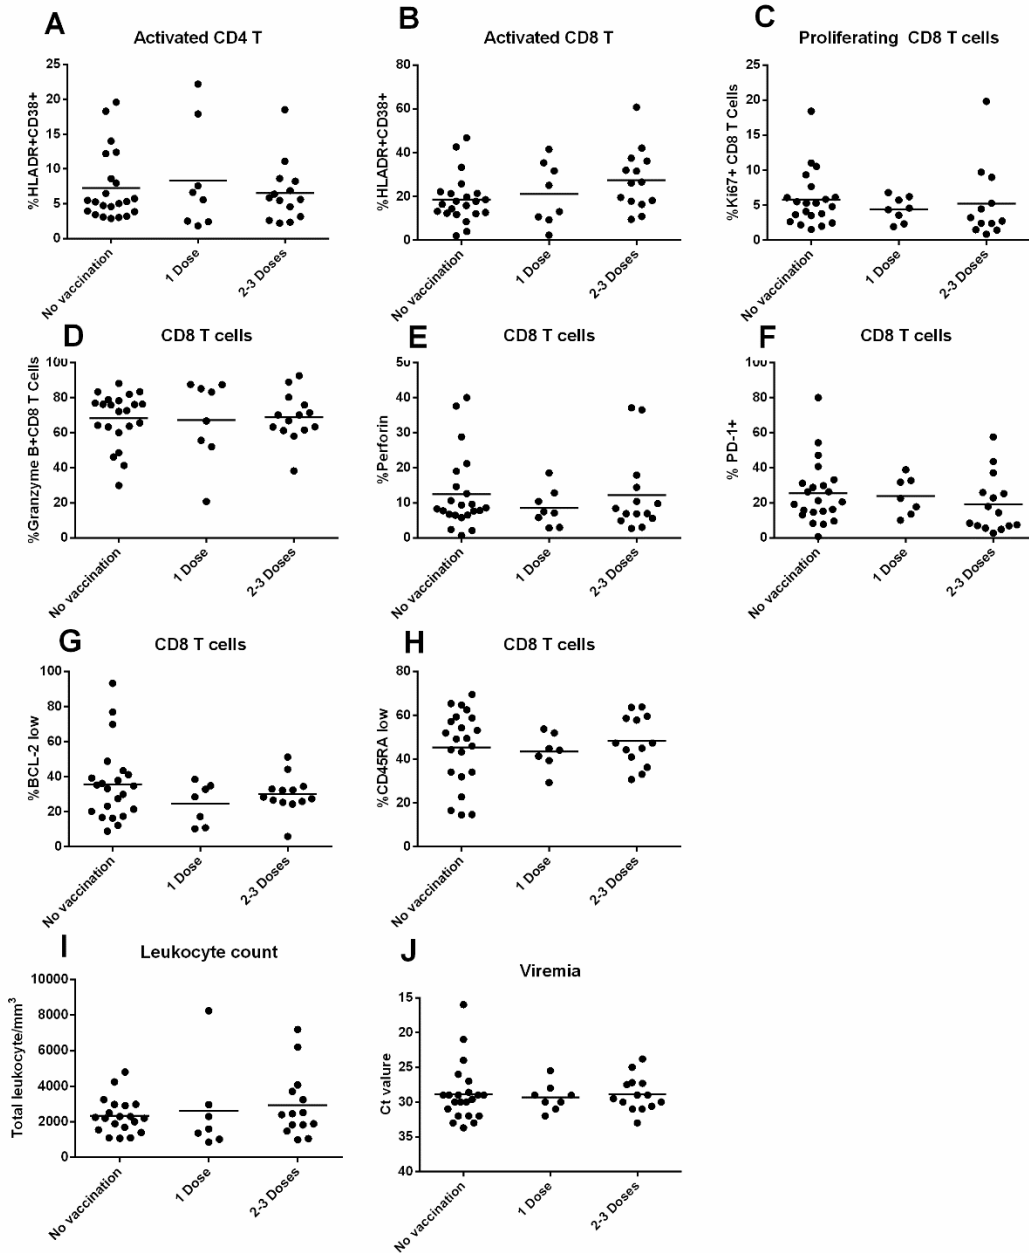

**T cell response and viremia among vaccinated and unvaccinated KFD cases in the acute phase.** (A, B) activated CD4 and CD8 T cell response among unvaccinated, vaccinated with 1 dose and 2-3 doses of KFDV vaccine. (C) Proliferating CD8 cells, (D-H) effector and memory T cell response. (I) total white blood counts among vaccinated and unvaccinated cases, (J) Acute

phase viremia. We did not find any statistically significant differences in T cell responses among vaccinated and unvaccinated KFDV cases. Mean is indicated by the line. Graphs were made using GraphPad Prism version 6.01

### Supplementary figure 3:

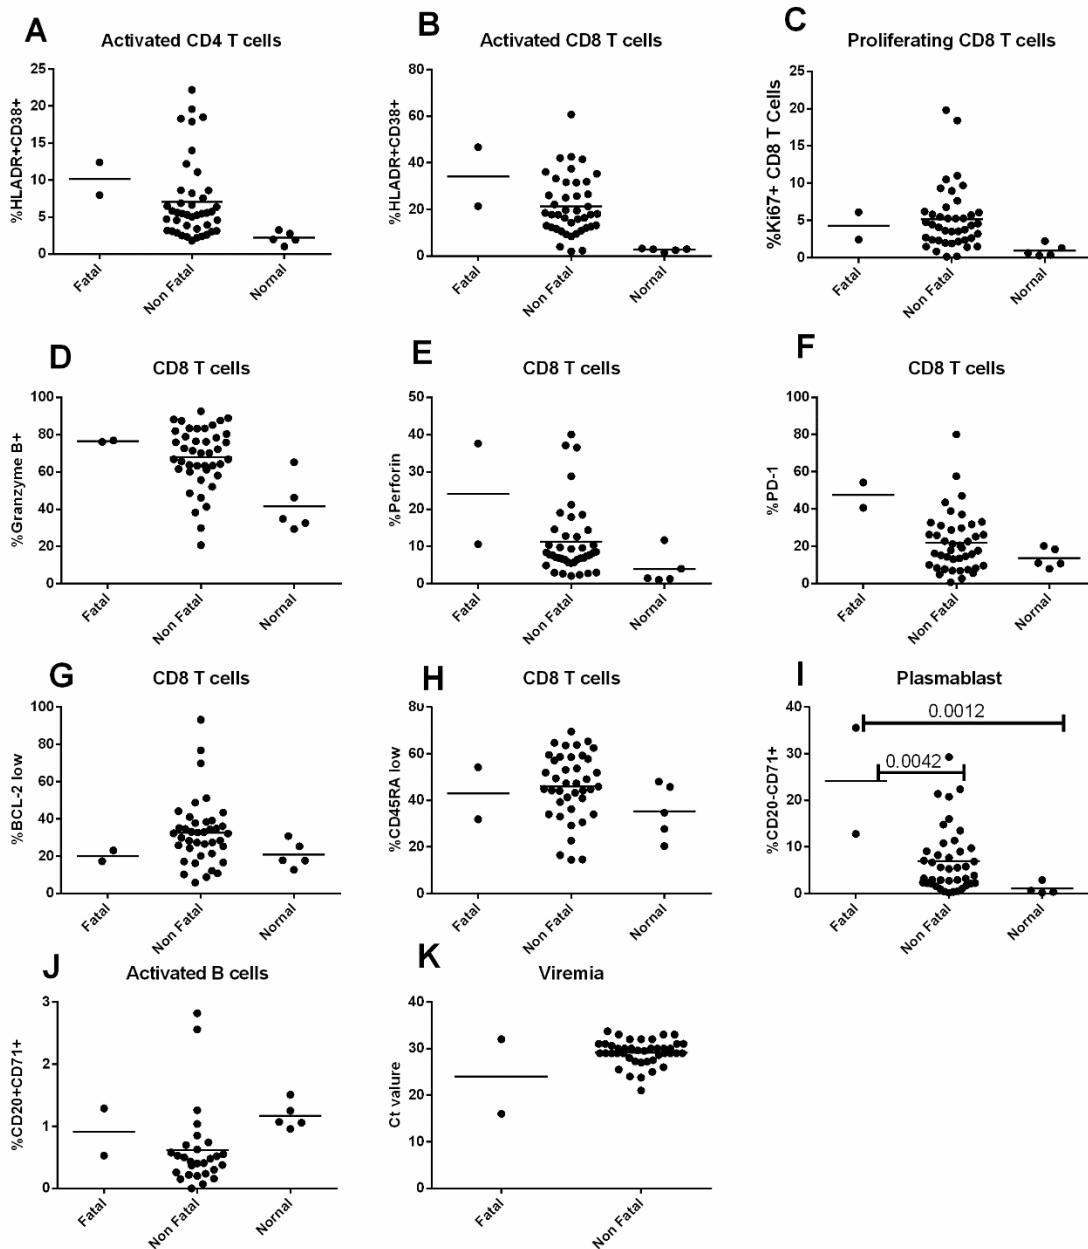

**Cellular immune response and viremia among fatal and non-fatal KFD cases.** Activated CD4 and CD8 T cell (A, B) proliferating CD8 cells (C), (D-H) effector and memory CD8 T cells, plasmablasts (I), activated B cells (J) and viral RNA load (K) in fatal and non-fatal KFD cases. Line indicates the mean. Graphs were made using GraphPad Prism version 6.01

**Supplementary figure 4**

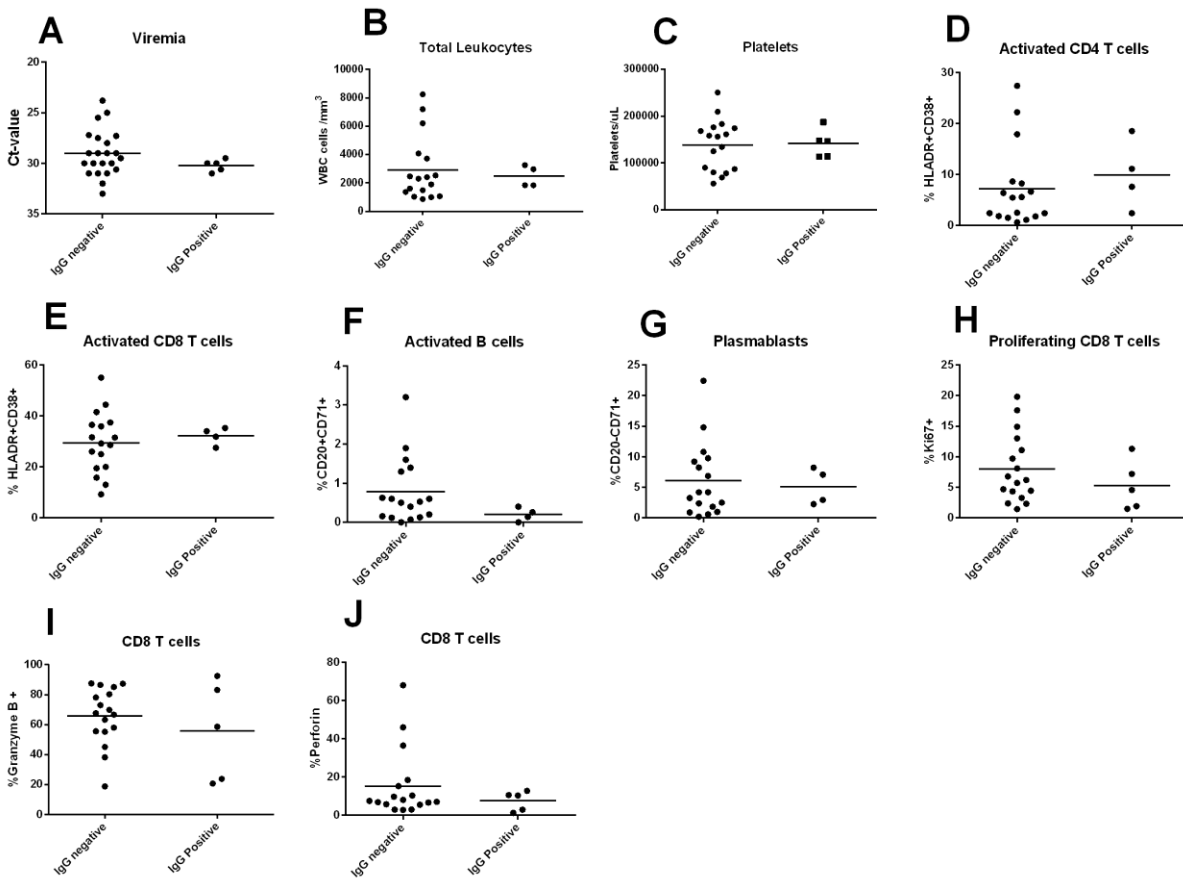

**T and B lymphocyte response and viremia analysis among KFD vaccinated patients with and without IgG response at the first time point (first bleed):** (A, B, C) comparison of viremia, total leukocyte and platelets, (D, E) activated CD4 and CD8 T cell response, (F, G) activated B cells and plasmablasts, (H) proliferating CD8 cells, (I, J) effector T cells response.

Line indicates the mean. Statistical significance was determined by one-way ANOVA followed by Mann-Whitney test. Graphs were made using GraphPad Prism version 6.01

### Supplementary Figure 5

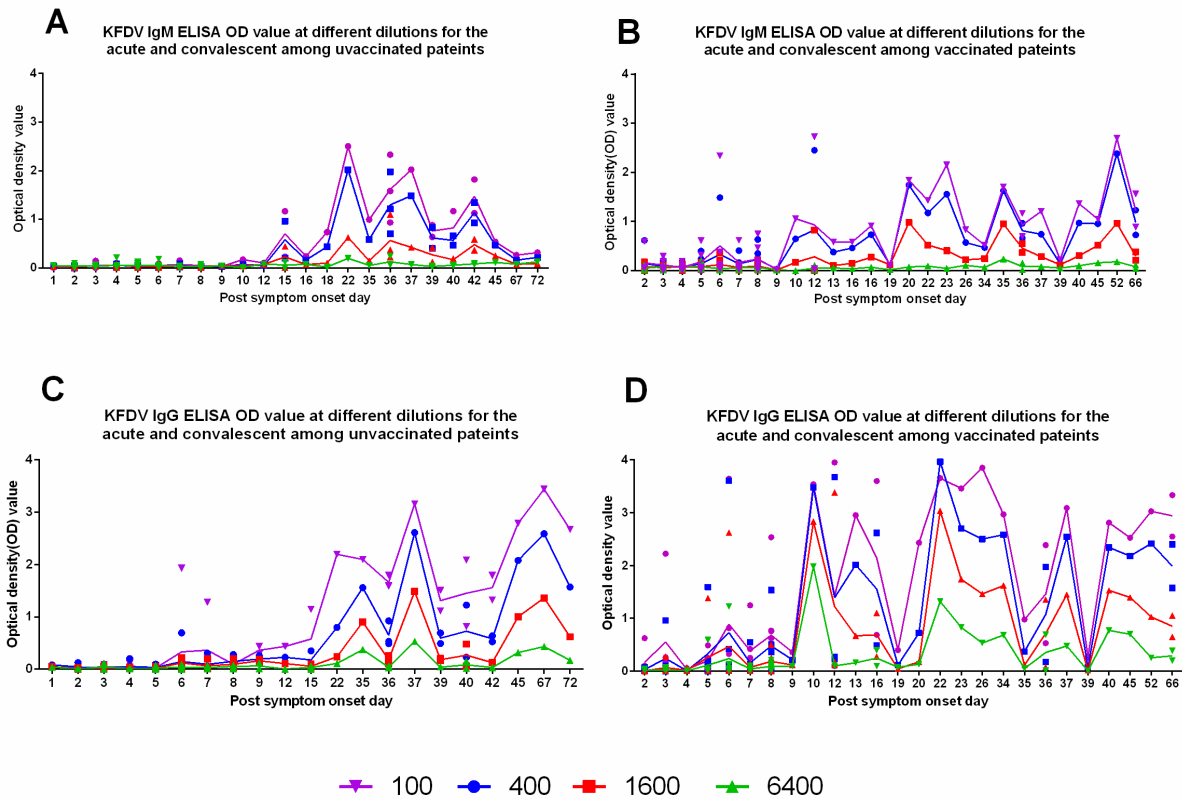

**Raw data of ELISA curves at different dilutions (1:100, 1:400, 1:1600, 1:6400) for the acute and convalescent patients:** KFDV IgM ELISA OD value of vaccinated and unvaccinated KFD individuals (A, B). KFDV IgG ELISA OD value of vaccinated and unvaccinated KFD individuals (C, D). Graphs were made using GraphPad Prism version 6.01

**Supplementary Table 1:** Antibody panel used for flow cytometry.

| <b>Panel</b>            | <b>Target</b>  | <b>Clone</b> | <b>Fluorophore</b> | <b>Company</b> |
|-------------------------|----------------|--------------|--------------------|----------------|
| True count              | CD19           | HIB19        | FITC               | BL             |
|                         | CD45           | H130         | PE                 | BD             |
|                         | CD3            | SK7          | PE/Cy7             | BL             |
|                         | CD8            | RPA-T8       | APC                | BL             |
| Naïve vs memory T cells | CD197 (CCR7)   | 3D12         | FITC               | BD             |
|                         | CD4            | RPA-T4       | PE                 | BL             |
|                         | CD45RA         | HI100        | PE/Cy7             | BL             |
|                         | CD8            | RPA-T8       | APC                | BL             |
| Activated CD4Tcells     | CD38           | HIT2         | FITC               | BL             |
|                         | HLA-DR         | G46-6        | PE                 | BD             |
|                         | CD3            | SK7          | PE/Cy7             | BL             |
|                         | CD4            | RPA-T4       | PE                 | BL             |
| Activated CD8 T cells   | CD38           | HIT2         | FITC               | BL             |
|                         | HLA-DR         | G46-6        | PE                 | BD             |
|                         | CD3            | SK7          | PE/Cy7             | BL             |
|                         | CD8            | RPA-T8       | APC                | BL             |
| Plasmablast             | CD19           | HIB19        | FITC               | BL             |
|                         | CD38           | HIT2         | PE                 | BL             |
|                         | CD3, CD20      | SK7, 2H7     | PE/Cy5             | BL,BD          |
|                         | CD27           | O323         | APC                | BL             |
| Activated B cells       | CD27           | O323         | FITC               | BL             |
|                         | CD19           | HIB19        | PE                 | BD             |
|                         | CD20           | 2H7          | PE/Cy7             | BD             |
|                         | CD71           | Cy1G4        | APC                | BL             |
| Effector CD8 T          | Ki67           | Ki67         | 488                | BL             |
|                         | Granzyme B     | GB11         | PE                 | BD             |
|                         | Perforin       | delta G9     | PE/Cy7             | BL             |
|                         | CD8            | RPA-T8       | APC                | BL             |
| Effector CD8 T          | Ki67           | Ki67         | 488                | BL             |
|                         | PD-1           | EH12.2H7     | PE                 | BL             |
|                         | CD152 (CTLA-4) | L3D10        | PE-Cy7             | BL             |
|                         | CD8            | RPA-T8       | APC                | BL             |
| Effector CD8 T          | Ki67           | Ki67         | 488                | BL             |
|                         | Bcl-2          | Bcl-2/100    | PE                 | BD             |
|                         | CD45RA         | HI100        | PE/Cy7             | BL             |
|                         | CD8            | RPA-T8       | APC                | BL             |

BD, Becton-Dickinson Biosciences; BL, BioLegend.
